# Supplementary material for: Comparing machine learning and deep learning models for probabilistic post-processing of satellite precipitation-driven streamflow simulation
Source: Copernicus journal article supplement (doi:10.5194/hess-2022-377), 2022-11-21
Supplement: Supplementary file 1 [file Basin_Attr.xlsx]

## Sheet: Basin_Attr
ID	Coordx	CoordY	Lon	Lat	Elevation	Area	FlowA	FlowD
1	-310214	2.80003e+06	101.87	26.6315	1298.37	128	127165	0
2	-321224	2.80813e+06	101.756	26.7011	1674.78	108.75	108.75	1
3	-299303	2.7982e+06	101.981	26.6181	1779.24	162	162	1
4	-300481	2.7879e+06	101.972	26.5253	1711.82	153.25	153.25	1
5	-304643	2.81097e+06	101.923	26.7313	1570.67	119.5	11017.8	1
6	-314937	2.82067e+06	101.816	26.8154	1791.04	239.75	115595	1
7	-293057	2.81925e+06	102.037	26.8088	1557.61	247.75	10625.2	5
8	-303436	2.82968e+06	101.929	26.8995	1949.22	273	273	5
9	-329425	2.81651e+06	101.671	26.7738	1917.52	179.25	179.25	6
10	-328502	2.83058e+06	101.675	26.9004	1912.85	245	115176	6
11	-287228	2.80989e+06	102.099	26.7263	1771.38	168.25	168.25	7
12	-316213	2.84565e+06	101.795	27.0393	1950.91	353.5	113068	10
13	-280961	2.81804e+06	102.16	26.8011	2075.93	117.75	117.75	7
14	-329692	2.86321e+06	101.652	27.1927	2432.89	466.75	466.75	12
15	-332963	2.84692e+06	101.624	27.0456	2177.75	101.25	101.25	10
16	-342776	2.83086e+06	101.531	26.8986	1788.43	279.25	1761.25	10
17	-281009	2.8343e+06	102.155	26.947	1795.44	201.25	9989.25	7
18	-291864	2.83602e+06	102.044	26.9596	1761.19	102.25	102.25	7
19	-303639	2.86177e+06	101.917	27.1874	2045.63	111.5	111992	12
20	-344122	2.85366e+06	101.509	27.1026	2175.89	387	387	16
21	-279362	2.85043e+06	102.167	27.0922	1741.54	169.75	9674.25	17
22	-287767	2.84679e+06	102.082	27.0574	1986.86	113.75	113.75	17
23	-299266	2.84844e+06	101.965	27.069	2162.67	150	150	12
24	-307916	2.84421e+06	101.879	27.0287	2252.46	106.5	106.5	12
25	-304178	2.87223e+06	101.908	27.281	1847.11	147.25	111367	19
26	-315805	2.86889e+06	101.791	27.2477	2000.89	197.75	513.25	19
27	-355669	2.82152e+06	101.404	26.8106	1849.62	359.25	359.25	16
28	-272665	2.85897e+06	102.232	27.1705	1728.73	136.5	9260.25	21
29	-270201	2.83838e+06	102.263	26.9863	2133.73	244.25	244.25	21
30	-298322	2.88665e+06	101.963	27.4119	2072.84	302.25	111114	25
31	-294650	2.87407e+06	102.004	27.3001	2443.76	105.25	105.25	25
32	-314207	2.88737e+06	101.801	27.4138	2759.65	151	151	26
33	-323927	2.87724e+06	101.706	27.3203	2771.48	164.5	164.5	26
34	-352098	2.84304e+06	101.432	27.0048	1761.2	105.75	575	16
35	-361560	2.83737e+06	101.338	26.9509	1931.83	160.75	160.75	16
36	-261129	2.85576e+06	102.35	27.1445	2179.39	180.75	898.5	28
37	-265706	2.86863e+06	102.3	27.2588	1906.3	115.25	8225.25	28
38	-293959	2.90882e+06	102.001	27.6117	2021.51	444.75	110683	30
39	-304961	2.89753e+06	101.892	27.5075	2563.95	129.5	129.5	30
40	-355432	2.85873e+06	101.393	27.1445	2523.17	165.5	165.5	34
41	-251720	2.85368e+06	102.446	27.128	2927.08	108	108	36
42	-255561	2.86764e+06	102.403	27.2523	2739.24	103	103	37
43	-290512	2.92783e+06	102.03	27.7829	2226.66	112.25	112.25	38
44	-365403	2.85429e+06	101.293	27.1014	2482.79	161.5	161.5	34
45	-369868	2.84615e+06	101.251	27.0268	2401.78	142.25	142.25	34
46	-249458	2.83781e+06	102.473	26.9862	2742.15	311	311	36
47	-262277	2.83055e+06	102.345	26.918	2363.07	298.75	298.75	36
48	-255529	2.87845e+06	102.401	27.3492	2762.7	123.25	123.25	37
49	-264944	2.88455e+06	102.303	27.4017	2254.29	222	7883.75	37
50	-301337	2.92798e+06	101.919	27.7813	2102.47	110	109727	38
51	-311959	2.91175e+06	101.816	27.6329	2716.37	398.75	398.75	38
52	-283897	2.86926e+06	102.115	27.2598	2139.88	543.75	543.75	49
53	-278251	2.88997e+06	102.166	27.4469	1975.11	194.25	7118	49
54	-296281	2.93984e+06	101.967	27.8888	2579.22	169.5	169.5	50
55	-265037	2.8981e+06	102.299	27.5231	2928.73	138.5	138.5	53
56	-274725	2.91608e+06	102.195	27.6818	2014.63	617	6785.25	53
57	-309136	2.94708e+06	101.834	27.95	2336.81	332	109119	50
58	-317641	2.93001e+06	101.752	27.7947	2797.79	328.5	328.5	50
59	-266078	2.91954e+06	102.282	27.7149	2207.21	168.75	168.75	56
60	-300838	2.95755e+06	101.915	28.0461	2908.89	147.5	147.5	57
61	-281527	2.92905e+06	102.121	27.7961	1911.28	187.5	187.5	56
62	-320372	2.94815e+06	101.718	27.9563	3051.8	123.25	123.25	57
63	-280750	2.94835e+06	102.124	27.9691	2048.62	370.75	5071.5	56
64	-305379	2.98899e+06	101.858	28.3259	2719.27	1150.75	108376	57
65	-323935	2.95605e+06	101.679	28.0259	3109.38	140	140	57
66	-261295	2.95181e+06	102.322	28.0049	2391.05	211.75	211.75	56
67	-289734	2.96074e+06	102.028	28.0776	2391.85	257.25	257.25	63
68	-296116	3.03236e+06	101.94	28.7161	3279.51	273.25	273.25	64
69	-308262	3.02101e+06	101.818	28.6113	2764.9	210.25	106952	64
70	-251972	2.94296e+06	102.42	27.928	2574.49	203.5	203.5	56
71	-258489	2.93154e+06	102.356	27.8242	2023.97	325.25	325.25	56
72	-263732	2.96439e+06	102.293	28.1169	2365.6	183.5	183.5	63
73	-272721	2.97245e+06	102.199	28.1868	2071.04	284.5	4260	63
74	-320945	3.01369e+06	101.69	28.5422	3128.14	102.75	3591.75	69
75	-316853	3.0022e+06	101.736	28.4408	2909.71	252.25	103150	69
76	-288120	2.97572e+06	102.04	28.212	2274.1	272.75	272.75	73
77	-309309	3.04159e+06	101.801	28.7949	3631.69	464	956.25	74
78	-325515	3.02083e+06	101.64	28.6047	3214.64	118.75	2532.75	74
79	-337201	3.00758e+06	101.525	28.4827	3550.68	627.5	627.5	75
80	-330308	2.97762e+06	101.606	28.2169	2932.88	628	102270	75
81	-264744	2.9859e+06	102.277	28.309	2428.7	168.75	1558.25	73
82	-310869	3.0744e+06	101.773	29.0874	4350.99	362	362	77
83	-314773	3.0622e+06	101.737	28.9773	4341.12	130.25	130.25	77
84	-323090	3.04258e+06	101.658	28.7997	3672.28	383.5	1971.75	78
85	-333563	3.02819e+06	101.555	28.668	3824.53	175.5	442.25	78
86	-349362	2.94219e+06	101.424	27.8941	2858.45	840	19582.2	80
87	-351584	2.97737e+06	101.388	28.208	3278.64	1066.25	82060.2	80
88	-258097	3.0017e+06	102.341	28.452	2890.7	138.25	138.25	81
89	-249763	2.98487e+06	102.431	28.3035	2542.2	554.5	1251.25	81
90	-271729	3.00394e+06	102.2	28.4686	2166.26	392.5	1946.25	73
91	-283594	2.98841e+06	102.083	28.3267	2214.4	198.25	198.25	73
92	-331503	3.05925e+06	101.565	28.946	3949.01	380.25	1468.75	84
93	-338491	3.04691e+06	101.497	28.8336	4227.95	119.5	119.5	84
94	-346116	3.03013e+06	101.424	28.6813	4137.81	124	124	85
95	-344027	3.03888e+06	101.443	28.7602	4206.53	142.75	142.75	85
96	-367172	2.95535e+06	101.236	28.0059	3130.58	381.25	381.25	86
97	-369354	2.99549e+06	101.198	28.3641	3505.89	104.5	104.5	87
98	-231198	2.97246e+06	102.625	28.1966	2745.02	201.5	201.5	89
99	-243524	2.95993e+06	102.502	28.0818	2784.85	495.25	495.25	89
100	-285853	3.00622e+06	102.054	28.4854	2508.4	393.25	393.25	90
101	-347589	3.07584e+06	101.392	29.089	4132.87	310.5	310.5	92
102	-377717	2.92221e+06	101.142	27.7057	3014.27	497.25	8402	86
103	-382229	2.95014e+06	101.084	27.9541	2929.21	427.75	9959	86
104	-352013	3.0071e+06	101.372	28.4736	3780.98	130.5	130.5	87
105	-367814	3.00808e+06	101.209	28.4771	3348.16	332.25	80759	87
106	-264495	3.01409e+06	102.272	28.5612	2909.81	116.75	116.75	90
107	-325862	3.07201e+06	101.619	29.0616	4307.41	115	115	92
108	-333622	3.07695e+06	101.537	29.1033	4115.41	191.25	663	92
109	-378246	2.88731e+06	101.15	27.3929	2695.8	729.5	4166	102
110	-397302	2.96167e+06	100.925	28.0517	2972.44	291.75	8797.5	103
111	-356408	3.02025e+06	101.322	28.5897	4058.21	136	136	105
112	-368075	3.02572e+06	101.2	28.6347	3279.75	304.25	80290.8	105
113	-282070	3.02428e+06	102.087	28.6478	2919.97	145.5	145.5	90
114	-327921	3.0907e+06	101.591	29.2278	4420.16	286.25	286.25	108
115	-341488	3.09218e+06	101.449	29.2368	4267.02	185.5	185.5	108
116	-399136	2.90099e+06	100.932	27.508	2765.51	243.75	1649.25	102
117	-393335	2.91703e+06	100.984	27.6537	2995.51	323.5	2089.5	102
118	-379333	2.97099e+06	101.106	28.1416	3411.25	129.75	613.25	103
119	-387677	2.97526e+06	101.018	28.1768	3307.48	120.5	120.5	103
120	-392874	2.98017e+06	100.963	28.2188	3304.49	132	132	110
121	-376272	3.02796e+06	101.114	28.6518	3675.36	121	121	112
122	-262336	3.02273e+06	102.291	28.6389	2957	113.75	113.75	90
123	-363338	2.86835e+06	101.309	27.2281	2865.44	161.5	161.5	109
124	-372076	2.8963e+06	101.209	27.4756	2871.88	264.5	264.5	109
125	-403585	2.88075e+06	100.895	27.3251	2749.54	418.5	1050.5	116
126	-414021	2.89855e+06	100.781	27.4806	2961.14	355	355	116
127	-393501	2.93204e+06	100.977	27.7881	3205.49	144.75	144.75	117
128	-411027	2.92717e+06	100.8	27.738	2962.64	505	1621.25	117
129	-381104	2.9857e+06	101.081	28.2725	3821.85	174.75	174.75	118
130	-404734	2.98244e+06	100.84	28.2348	3155.38	117.25	8183.5	110
131	-408247	2.96864e+06	100.81	28.11	3472.51	190.25	190.25	110
132	-354418	3.04691e+06	101.332	28.8284	3959.61	409.75	409.75	112
133	-372945	3.0401e+06	101.144	28.7614	3451.03	111.75	79455.8	112
134	-259665	3.03898e+06	102.314	28.7848	3047.97	391	391	90
135	-279200	3.03815e+06	102.113	28.7724	2962.98	393.5	393.5	90
136	-382989	2.86061e+06	101.112	27.1519	2936.41	345	345	109
137	-386737	2.8721e+06	101.07	27.2537	2766.44	166.25	166.25	109
138	-352565	2.87806e+06	101.415	27.3187	2997.18	343.5	343.5	109
139	-401939	2.85929e+06	100.921	27.1334	2904.36	284.5	284.5	125
140	-417890	2.87084e+06	100.754	27.2308	2822.68	347.5	347.5	125
141	-422723	2.9405e+06	100.674	27.8528	3003.71	141.25	141.25	128
142	-365639	2.97523e+06	101.244	28.1843	3770.76	205.75	205.75	118
143	-374622	2.98684e+06	101.148	28.2849	3789.02	103	103	118
144	-400060	2.99916e+06	100.881	28.3859	3373.41	410.5	7923.5	130
145	-410307	3.00118e+06	100.775	28.4002	3948.72	142.75	142.75	130
146	-368134	3.05253e+06	101.188	28.874	3278.21	153	79152.8	133
147	-379478	3.04954e+06	101.072	28.8434	3630.83	191.25	191.25	133
148	-362429	2.91029e+06	101.302	27.6042	2932.78	364.75	364.75	109
149	-398843	2.94175e+06	100.918	27.873	3176.38	208	208	128
150	-412949	2.95224e+06	100.769	27.9615	3370.64	357.25	357.25	128
151	-423579	2.91407e+06	100.677	27.6159	3514.72	272.25	272.25	128
152	-430868	2.93111e+06	100.595	27.7656	3378.39	137.5	137.5	128
153	-391636	3.00658e+06	100.965	28.4553	3613.02	115	432.25	144
154	-400520	3.0211e+06	100.867	28.5818	3594.46	272.5	7080.75	144
155	-359927	3.05992e+06	101.27	28.9428	4079.61	119.5	119.5	146
156	-348203	2.91661e+06	101.445	27.6654	2787.98	537.5	537.5	109
157	-347168	2.89039e+06	101.465	27.4309	2554.85	163.75	1253.5	109
158	-386133	3.02018e+06	101.016	28.5788	4163.01	118.5	118.5	153
159	-383258	3.00514e+06	101.051	28.4454	3994.01	198.75	198.75	153
160	-394377	3.03444e+06	100.925	28.7032	3485.6	131	6673.5	154
161	-406448	3.03367e+06	100.8	28.6918	4230.42	134.75	134.75	154
162	-359631	3.07189e+06	101.269	29.0498	4153.36	241	241	146
163	-374058	3.06614e+06	101.121	28.9935	3403.87	191.5	78639.2	146
164	-333867	2.92405e+06	101.588	27.7366	3093.69	350.5	350.5	157
165	-400425	3.06614e+06	100.849	28.9839	3863.58	773.5	6155	160
166	-363415	3.08287e+06	101.225	29.1464	4259.99	138.25	138.25	163
167	-329840	2.90997e+06	101.635	27.6117	2923.93	252	252	157
168	-334621	2.89528e+06	101.591	27.4786	2699.52	236.5	487.25	157
169	-385657	3.03675e+06	101.014	28.727	3932.82	163.75	163.75	160
170	-389692	3.05744e+06	100.963	28.9102	4072.5	223.75	223.75	160
171	-408248	3.10994e+06	100.748	29.3717	4081.04	476	5126.5	165
172	-413302	3.09402e+06	100.703	29.2278	4123.17	255	255	165
173	-375318	3.08869e+06	101.099	29.1942	3653.42	309.75	78187.8	163
174	-381431	3.0706e+06	101.043	29.0307	3982.99	121.75	121.75	163
175	-322678	2.89552e+06	101.712	27.4844	3026.58	122	122	168
176	-328265	2.88661e+06	101.659	27.4029	3004.87	128.75	128.75	168
177	-421354	3.13128e+06	100.602	29.5568	4157	161.25	4403.25	171
178	-424719	3.11854e+06	100.573	29.4419	4271.78	247.25	247.25	171
179	-386013	3.0805e+06	100.992	29.1174	4020.65	140.5	140.5	173
180	-410087	3.13275e+06	100.719	29.5744	4183.18	129.5	129.5	177
181	-429164	3.14739e+06	100.513	29.6973	4026.86	406	4112.5	177
182	-389923	3.0913e+06	100.947	29.2123	4013.69	123.5	123.5	173
183	-436035	3.16131e+06	100.434	29.8185	4141.7	266.25	266.25	181
184	-379802	3.11139e+06	101.043	29.3951	3602.1	269	77253.2	173
185	-393502	3.11e+06	100.901	29.3778	3937	360.75	360.75	173
186	-368974	3.09897e+06	101.161	29.2882	4350.52	126.75	126.75	184
187	-437533	3.13749e+06	100.43	29.6057	4226.14	243	243	181
188	-448707	3.13687e+06	100.314	29.5955	4419.74	133	133	181
189	-456395	3.14159e+06	100.231	29.6343	4487.6	166.5	166.5	181
190	-361489	3.10874e+06	101.235	29.3779	4173.72	299.5	5834.5	184
191	-369680	3.12623e+06	101.143	29.531	3900.22	316.75	71023	184
192	-465365	3.14961e+06	100.134	29.7019	4461.06	245.5	245.5	181
193	-352299	3.10113e+06	101.334	29.3131	4462.54	222.5	222.5	190
194	-354310	3.12444e+06	101.304	29.5203	4156.03	186	5312.5	190
195	-375480	3.14727e+06	101.073	29.7165	3775.06	352.5	70463	191
196	-384080	3.12869e+06	100.992	29.5479	4109.54	243.25	243.25	191
197	-451684	3.16327e+06	100.27	29.8294	4271.87	168.5	2435	181
198	-462312	3.1598e+06	100.16	29.794	4521.88	217.25	217.25	181
199	-344317	3.1406e+06	101.402	29.6676	4093.68	348.75	4040	194
200	-343520	3.12423e+06	101.416	29.5219	4075.33	123.75	1086.5	194
201	-370891	3.16106e+06	101.116	29.841	3618.2	369	66964.8	195
202	-447595	3.17718e+06	100.306	29.9551	4102.6	199.75	199.75	197
203	-459372	3.18205e+06	100.18	29.9933	4306.63	245.25	2066.75	197
204	-329398	3.13474e+06	101.56	29.6201	4255.28	310.75	310.75	199
205	-333765	3.11726e+06	101.52	29.4629	4251.46	211.75	815.5	200
206	-343575	3.10811e+06	101.422	29.3782	4481.18	147.25	147.25	200
207	-368240	3.17592e+06	101.138	29.9743	3935.53	108.75	108.75	201
208	-377376	3.17954e+06	101.04	30.0033	3531.52	346	66487	201
209	-398785	3.14036e+06	100.833	29.6464	4252.17	597.5	2012	195
210	-466124	3.17155e+06	100.115	29.897	4653.19	106.5	106.5	203
211	-341031	3.15605e+06	101.43	29.8064	4082.05	209.25	209.25	199
212	-316718	3.1321e+06	101.693	29.6004	4361.55	325.25	325.25	205
213	-325351	3.10515e+06	101.612	29.3575	4492.28	278.5	278.5	205
214	-405443	3.15453e+06	100.757	29.7702	4474.57	138.5	138.5	209
215	-420360	3.16158e+06	100.598	29.8272	4260.09	223.25	1276	209
216	-394431	3.15363e+06	100.873	29.7664	4362.99	103.25	103.25	195
217	-397058	3.16758e+06	100.839	29.8896	4068.01	371	1030.5	195
218	-474817	3.1995e+06	100.009	30.1419	4427.86	580.5	1564	203
219	-471629	3.18455e+06	100.05	30.0103	4502.23	151	151	203
220	-322197	3.14763e+06	101.63	29.7372	4138.89	147	147	199
221	-330985	3.15682e+06	101.535	29.8164	3861.4	118.75	3024.25	199
222	-353387	3.19803e+06	101.284	30.1762	3875.76	383.75	383.75	208
223	-388491	3.18277e+06	100.922	30.0281	3837	153.5	153.5	208
224	-421349	3.17575e+06	100.581	29.9531	4249.67	149.75	149.75	215
225	-435664	3.18352e+06	100.428	30.0164	4329.26	427	903	215
226	-413680	3.19096e+06	100.655	30.0915	4104.98	296.25	296.25	217
227	-418721	3.18356e+06	100.605	30.0236	4273	363.25	363.25	217
228	-495829	3.19243e+06	99.7923	30.0694	4700.17	134	134	218
229	-317553	3.15915e+06	101.675	29.8412	4106.84	214	214	221
230	-324076	3.17269e+06	101.602	29.9599	3920.19	273.5	2691.5	221
231	-352250	3.18965e+06	101.3	30.102	4027.13	121.25	121.25	208
232	-355934	3.18117e+06	101.264	30.0253	4052.77	138.25	138.25	208
233	-364787	3.20049e+06	101.164	30.1943	3813.16	158	158	208
234	-381964	3.19601e+06	100.985	30.1484	3436.26	150.75	65186.2	208
235	-441675	3.20388e+06	100.355	30.1952	4401.63	280.75	280.75	225
236	-454783	3.20113e+06	100.218	30.1652	4533.11	195.25	195.25	225
237	-503499	3.2126e+06	99.7006	30.2452	4574.98	526	526	218
238	-508000	3.19211e+06	99.6649	30.0607	4778.66	323.5	323.5	218
239	-343314	3.17075e+06	101.401	29.9365	4022.03	293.75	728.25	230
240	-319922	3.1778e+06	101.643	30.0067	3985.42	107.75	107.75	230
241	-355308	3.1485e+06	101.284	29.7344	4380.02	203.5	203.5	239
242	-358633	3.16226e+06	101.244	29.8559	4270.65	231	231	239
243	-365973	3.20654e+06	101.149	30.2477	4064.91	119.75	119.75	234
244	-371741	3211729	101.086	30.2919	3714.49	129.25	1695.75	234
245	-384334	3.21607e+06	100.952	30.3261	3851.73	284.5	19145	234
246	-392393	3.20356e+06	100.872	30.2117	3476.22	242.75	44075	234
247	-333933	3.19743e+06	101.489	30.1772	3920	599	966.5	230
248	-358399	3.21646e+06	101.225	30.3386	4318.71	121.5	121.5	244
249	-360787	3.22959e+06	101.194	30.4547	4136.99	336.5	1445	244
250	-391206	3.22626e+06	100.875	30.4142	4160.59	101.75	101.75	245
251	-398806	3.19063e+06	100.811	30.0942	3940.29	196.25	196.25	246
252	-325721	3.19303e+06	101.577	30.1406	3810.93	114.5	114.5	230
253	-337890	3.22077e+06	101.439	30.3837	4096.25	232.5	232.5	247
254	-343181	3.21418e+06	101.385	30.3234	4174.92	135	135	247
255	-342740	3.23155e+06	101.383	30.4782	3948.09	206.5	884.25	249
256	-351197	3.24655e+06	101.288	30.6088	4227.01	224.25	224.25	249
257	-378846	3.22857e+06	101.004	30.4393	3826.07	131.5	18619.8	245
258	-392365	3.23281e+06	100.86	30.4721	4138.08	139	139	245
259	-417868	3.20751e+06	100.603	30.2372	3989.74	463.75	463.75	246
260	-316058	3.20106e+06	101.676	30.215	4075.46	273	273	230
261	-310866	3.18312e+06	101.736	30.0567	4157.4	228	228	230
262	-340492	3.25608e+06	101.398	30.6971	4106.58	431.25	431.25	255
263	-370565	3.23835e+06	101.087	30.5292	3926.59	182	18271.5	257
264	-391500	3.24143e+06	100.865	30.5491	4066.75	216.75	216.75	257
265	-412208	3.24178e+06	100.647	30.5443	4181.79	581.25	581.25	246
266	-412432	3.22015e+06	100.654	30.3517	3639.5	279.25	42591	246
267	-329031	3.23961e+06	101.525	30.5542	3899.92	120.5	120.5	255
268	-326122	3.22624e+06	101.561	30.4361	3954.37	126	126	255
269	-366538	3.24734e+06	101.126	30.6106	4057.77	116.5	17578	263
270	-402953	3.25542e+06	100.738	30.6692	4241.35	511.5	511.5	263
271	-413546	3.23645e+06	100.635	30.4964	3921.23	115	115	266
272	-376030	3.25763e+06	101.022	30.6988	3994.33	245.5	16519.2	269
273	-398476	3.26619e+06	100.781	30.7667	4126.84	547.25	942.25	269
274	-423631	3.24406e+06	100.525	30.5601	4201.04	182.25	182.25	266
275	-432488	3.23397e+06	100.436	30.4667	3734.51	345.25	42014.5	266
276	-368272	3.26788e+06	101.099	30.7927	3854.14	139.75	15316	272
277	-381013	3.27141e+06	100.963	30.8195	3972.08	174.75	957.75	272
278	-412683	3.288e+06	100.62	30.9551	4409.35	105.5	105.5	273
279	-422342	3.28096e+06	100.521	30.8887	4392.85	289.5	289.5	273
280	-434229	3.22361e+06	100.423	30.3738	4198.29	138.5	138.5	275
281	-366488	3.27891e+06	101.114	30.8914	3568.76	175	14973.5	276
282	-359160	3.26045e+06	101.199	30.7298	4049.82	202.75	202.75	276
283	-382182	3.28695e+06	100.944	30.9573	4233.62	218.25	218.25	277
284	-401324	3.29094e+06	100.739	30.9856	4332.83	564.75	564.75	277
285	-434469	3.25497e+06	100.405	30.6527	4366.67	215.5	215.5	275
286	-357144	3.28288e+06	101.211	30.9299	3749.59	187.75	549.5	281
287	-375084	3.30164e+06	101.013	31.0905	3807.08	681.5	14249	281
288	-444925	3.25177e+06	100.297	30.6199	3963.23	269	40852	275
289	-351018	3.29114e+06	101.273	31.0055	4376.81	122.25	122.25	286
290	-453417	3.2684e+06	100.198	30.7641	3991.03	360	38401.8	288
291	-461316	3.24862e+06	100.125	30.5848	4067.72	308.75	2181.25	288
292	-447351	3.22052e+06	100.287	30.3409	4233.13	349.5	349.5	275
293	-452059	3.23401e+06	100.23	30.4589	4241.99	113.75	113.75	275
294	-346016	3.28155e+06	101.329	30.9218	4445.56	127.75	127.75	286
295	-349533	3.26877e+06	101.297	30.807	4240.55	111.75	111.75	286
296	-374366	3.32398e+06	101.011	31.2892	4089.75	304.25	304.25	287
297	-384370	3.33805e+06	100.898	31.4106	4036.64	537	537	287
298	-397772	3.32673e+06	100.761	31.305	3688.58	311	12287.2	287
299	-468308	3.28175e+06	100.034	30.8763	4363.38	690	690	290
300	-475346	3.24984e+06	99.9766	30.5894	4498.53	338.25	338.25	291
301	-400856	3.34608e+06	100.719	31.4757	3797.56	154	6821.75	298
302	-412425	3.33817e+06	100.599	31.401	3942.61	306.25	5154.5	298
303	-394804	3.30213e+06	100.803	31.0876	4225.15	158.75	158.75	287
304	-406877	3.3144e+06	100.669	31.192	4160.5	280.25	280.25	287
305	-446494	3.28075e+06	100.265	30.8769	3991.46	163.5	36712.8	290
306	-462326	3.30472e+06	100.085	31.0831	4383.29	639	639	290
307	-459159	3.22493e+06	100.16	30.3751	4486.68	170.5	170.5	291
308	-474081	3.22286e+06	100.004	30.3501	4519.76	621.25	1363.75	291
309	-413097	3.36149e+06	100.581	31.6078	3975.23	309.5	6250	301
310	-425396	3.3544e+06	100.453	31.5399	4028.68	261.5	4741.25	302
311	-423502	3.34228e+06	100.479	31.4331	4250.51	107	107	302
312	-439444	3.30413e+06	100.328	31.0876	3966.89	503.5	36297.5	305
313	-435870	3.28016e+06	100.378	30.8761	4168.12	251.75	251.75	305
314	-488549	3.23498e+06	99.8455	30.4513	4544.4	149.5	567.5	308
315	-493598	3.22386e+06	99.7984	30.35	4552.36	175	175	308
316	-398863	3.36664e+06	100.731	31.6591	4029.21	299.75	299.75	301
317	-393834	3.34781e+06	100.793	31.4938	4163.69	118	118	301
318	-409609	3.37758e+06	100.611	31.7521	4125.89	151.75	151.75	309
319	-440754	3.36894e+06	100.282	31.6626	3972.27	349.5	4345.25	310
320	-435962	3.353e+06	100.341	31.5231	4360.84	134.5	134.5	310
321	-443926	3.32675e+06	100.269	31.2867	4045.67	199.5	35629.2	312
322	-451804	3.31683e+06	100.191	31.1952	4362.67	164.75	164.75	312
323	-489631	3.24829e+06	99.8267	30.5692	4594.76	255	255	314
324	-500476	3.24382e+06	99.7149	30.5244	4697.53	163	163	314
325	-417574	3.38135e+06	100.524	31.7824	4232.01	120.5	120.5	309
326	-454503	3.40174e+06	100.118	31.9479	4140.26	679.5	3809	319
327	-456817	3.38008e+06	100.104	31.7546	4300.96	186.75	186.75	319
328	-464230	3.33093e+06	100.051	31.315	4384.16	373.25	866.25	321
329	-421539	3.38817e+06	100.478	31.8413	4170.25	112.5	112.5	309
330	-430412	3.38665e+06	100.384	31.8241	4110.44	479.5	5555.75	309
331	-467298	3.40521e+06	99.9785	31.9729	4209.59	199.5	199.5	326
332	-436878	3.33651e+06	100.34	31.3763	4382.74	308.5	932.5	321
333	-454182	3.3432e+06	100.152	31.4284	4163.66	161.5	33631	321
334	-480573	3.34343e+06	99.8704	31.4186	4532.52	121.75	351.75	328
335	-477042	3.32565e+06	99.9177	31.2624	4529.62	141.25	141.25	328
336	-436642	3.4143e+06	100.303	32.0669	4096.86	110.75	349.75	330
337	-444849	3.41291e+06	100.215	32.0511	4112.97	499	4726.5	330
338	-467164	3.42984e+06	99.9666	32.1914	4188.97	107.75	107.75	326
339	-474056	3.42595e+06	99.8946	32.1539	4068.24	262.5	2822.25	326
340	-420884	3.32655e+06	100.515	31.2944	4480.78	176.5	176.5	332
341	-423991	3.30691e+06	100.491	31.1187	4330.74	447.5	447.5	332
342	-464032	3.3416e+06	100.048	31.4099	4559.67	117.75	117.75	333
343	-461088	3.35782e+06	100.07	31.5551	3974.63	206.5	33351.8	333
344	-490165	3.33375e+06	99.7736	31.3282	4506.12	118.25	118.25	334
345	-484567	3.32828e+06	99.8362	31.2823	4506.24	111.75	111.75	334
346	-429925	3.41263e+06	100.376	32.0549	4256.16	113	113	336
347	-442237	3.43669e+06	100.231	32.2631	4155.92	126	126	336
348	-455783	3.4559e+06	100.075	32.4276	4283.27	424.25	424.25	337
349	-459376	3.43941e+06	100.045	32.2798	4090.73	241.25	3803.25	337
350	-476733	3.44571e+06	99.8548	32.3278	4262.25	138.5	138.5	339
351	-484156	3.44296e+06	99.7764	32.3	4207.53	225	2421.25	339
352	-450891	3.35816e+06	100.179	31.5626	4203.27	232.5	232.5	343
353	-467214	3.46291e+06	99.9479	32.4846	4305.9	104.75	104.75	349
354	-475692	3.46737e+06	99.8539	32.5203	4233	497.5	3457.25	349
355	-483738	3.42115e+06	99.7932	32.1068	4193.43	269	269	351
356	-465834	3.37636e+06	100.01	31.7176	4144.43	203.75	203.75	343
357	-475042	3.36473e+06	99.9177	31.6103	4172.33	195.75	32575	343
358	-470501	3.35288e+06	99.9726	31.5071	4424.99	134	134	343
359	-490755	3.48344e+06	99.6819	32.6557	4336.12	206.5	206.5	354
360	-486760	3.45702e+06	99.7403	32.4234	4447.8	166	166	351
361	-496972	3.44938e+06	99.6346	32.3509	4291.98	337	1761.25	351
362	-477865	3.37948e+06	99.8794	31.7399	4380.31	142.75	142.75	357
363	-491059	3.37311e+06	99.7419	31.6772	4084.49	458	32236.5	357
364	-479506	3.49748e+06	99.7956	32.7854	4370.76	109	109	354
365	-487898	3.5063e+06	99.6996	32.8596	4345.35	389.75	2644.25	354
366	-497346	3.46465e+06	99.6217	32.486	4516.02	110	110	361
367	-511746	3.47518e+06	99.4599	32.5724	4405.38	832.75	1314.25	361
368	-497057	3.52253e+06	99.5907	32.999	4509.3	152	152	365
369	-500618	3.50879e+06	99.5602	32.8756	4316.29	134.5	2102.5	365
370	-521347	3.50082e+06	99.3404	32.7947	4485.97	115.25	115.25	367
371	-530415	3.49867e+06	99.2435	32.771	4529.51	366.25	366.25	367
372	-484328	3.38819e+06	99.8054	31.8142	4405.59	102.25	102.25	363
373	-502479	3.37742e+06	99.6174	31.7101	4202.71	243.25	243.25	363
374	-512821	3.52476e+06	99.4182	33.0111	4459.69	371.75	371.75	369
375	-488024	3.3971e+06	99.7608	31.8915	4237.94	185.75	551.5	363
376	-487614	3.35632e+06	99.7882	31.5298	4627.71	152.5	152.5	363
377	-529796	3.53179e+06	99.2294	33.0647	4510.82	678	1217	369
378	-474664	3.39558e+06	99.9048	31.8842	4404.79	212.5	212.5	375
379	-488957	3.41629e+06	99.7399	32.0613	4329.39	153.25	153.25	375
380	-511708	3.38999e+06	99.5113	31.817	4224.56	284.25	1970.75	363
381	-510126	3.36201e+06	99.5447	31.5696	4620.96	350	350	363
382	-494198	3.34775e+06	99.7228	31.4507	4499.11	191.75	191.75	363
383	-498744	3.48917e+06	99.5921	32.7027	4383.11	180.5	180.5	369
384	-507880	3.4968e+06	99.4887	32.7658	4281.26	198.75	198.75	369
385	-548434	3.55776e+06	99.0098	33.2848	4747.52	206.75	206.75	377
386	-556136	3.5486e+06	98.932	33.1995	4692.58	332.25	332.25	377
387	-512333	3.41898e+06	99.4873	32.0739	4082.65	534.5	28101.5	363
388	-511520	3.3997e+06	99.5075	31.9033	4446.9	115	115	363
389	-529628	3.3994e+06	99.3137	31.8916	4238.28	279.5	1502	380
390	-519886	3.38036e+06	99.4295	31.7276	4544.5	184.5	184.5	380
391	-504777	3.41298e+06	99.572	32.0244	4189.37	115.75	392.25	387
392	-544091	3.40985e+06	99.1522	31.9767	4261.73	218.5	627	389
393	-494706	3.4119e+06	99.6807	32.0196	4268.54	102.25	102.25	391
394	-499916	3.42404e+06	99.6177	32.1247	4294.07	174.25	174.25	391
395	-519752	3.41089e+06	99.4126	31.9985	4289.73	121.75	121.75	387
396	-542972	3.4203e+06	99.1576	32.07	4480.89	298.5	298.5	392
397	-556198	3.41237e+06	99.0207	31.9927	4559.14	110	110	392
398	-551292	3.39767e+06	99.0827	31.8649	4646.4	314.75	314.75	389
399	-533958	3.38509e+06	99.2761	31.7624	4558.82	280.75	280.75	389
400	-506986	3.43406e+06	99.5358	32.2102	4299.57	118	118	387
401	-530147	3.4218e+06	99.2943	32.0899	4333.26	128	128	387
402	-517096	3.45382e+06	99.4151	32.3804	4223.41	304.25	576.75	387
403	-522984	3.44729e+06	99.3557	32.3195	4341.7	108.75	108.75	387
404	-530166	3.44053e+06	99.2825	32.256	4210.79	225	26006.8	387
405	-535338	3.43058e+06	99.2331	32.1651	4422.23	114.75	114.75	387
406	-530896	3.47792e+06	99.2513	32.587	4352.81	166.25	166.25	402
407	-531065	3.4633e+06	99.2587	32.4573	4426.31	106.25	106.25	402
408	-535446	3.45382e+06	99.2174	32.3711	4271.44	125	125	404
409	-547123	3.44436e+06	99.0976	32.2811	4182.96	260.25	25656.8	404
410	-552151	3.43581e+06	99.049	32.2027	4364.31	148.75	148.75	409
411	-570440	3.44464e+06	98.8465	32.271	4212.15	178	1803.5	409
412	-558504	3.45575e+06	98.9677	32.376	4126.56	192.75	23262.8	409
413	-571923	3.45687e+06	98.8224	32.3786	4333.56	181.5	181.5	409
414	-561427	3.4349e+06	98.9499	32.1896	4393.8	101.25	101.25	411
415	-563771	3.46644e+06	98.9039	32.4678	4337.82	134.75	134.75	412
416	-567739	3.42469e+06	98.8888	32.0957	4450.71	398	398	411
417	-557115	3.4766e+06	98.969	32.5615	4269.94	252.5	513	412
418	-545483	3.46706e+06	99.1007	32.4832	4191.84	355.25	22422.2	412
419	-583553	3.45015e+06	98.7017	32.3126	4228.75	157.25	666	411
420	-569866	3.48445e+06	98.826	32.624	4411.4	127.75	127.75	417
421	-570672	3.47529e+06	98.8235	32.5425	4446.92	132.75	132.75	417
422	-538062	3.47684e+06	99.1746	32.5737	4309.99	101	101	418
423	-549728	3.49572e+06	99.0363	32.7348	4197.91	448.75	21966	418
424	-583253	3.46837e+06	98.6924	32.4741	4519.09	267.5	267.5	419
425	-596161	3.46539e+06	98.5553	32.4404	4462.34	241.25	241.25	419
426	-603369	3.45773e+06	98.483	32.3684	4400.38	295	295	411
427	-584683	3.43762e+06	98.6981	32.2009	4354.48	165.25	165.25	411
428	-550802	3.52546e+06	99.0053	32.9975	4601.97	127.75	127.75	423
429	-563289	3.53067e+06	98.8662	33.0369	4567.54	650.5	650.5	423
430	-567169	3.50298e+06	98.8427	32.7896	4315.6	281	20224.5	423
431	-538967	3.5142e+06	99.141	32.9041	4506.28	393.5	393.5	423
432	-545291	3.52475e+06	99.0656	32.9942	4575.22	121	121	423
433	-573254	3.52082e+06	98.7647	32.9443	4376.62	171.5	171.5	430
434	-584432	3.51177e+06	98.6497	32.8578	4263.72	373.75	19772	430
435	-578724	3.53038e+06	98.6988	33.0258	4467.51	186	186	434
436	-583504	3.53852e+06	98.6412	33.0951	4509.82	239.75	239.75	434
437	-585379	3.49165e+06	98.6534	32.6791	4396.1	463	463	434
438	-590833	3.54214e+06	98.559	33.123	4372.93	195.25	1626.25	434
439	-599499	3.53233e+06	98.4718	33.0312	4512.98	129.5	129.5	434
440	-603324	3.51652e+06	98.4416	32.889	4156.08	243	15400.8	434
441	-607586	3.49792e+06	98.4088	32.7218	4224.64	456.25	1353	434
442	-598165	3.55317e+06	98.4714	33.2163	4442.73	210.75	210.75	438
443	-614677	3.53502e+06	98.3051	33.046	4257.53	284.25	14885.5	440
444	-618607	3.50975e+06	98.281	32.82	4389.27	272.25	272.25	440
445	-602144	3.48779e+06	98.4749	32.6353	4359.42	169.25	169.25	441
446	-581234	3.55728e+06	98.6528	33.2625	4684.39	178.25	178.25	438
447	-593842	3.56815e+06	98.5078	33.3514	4525.2	192.25	1042	438
448	-609008	3.54267e+06	98.3611	33.1171	4541.2	130.5	130.5	443
449	-627195	3.4919e+06	98.2012	32.6568	4618.2	270.5	270.5	441
450	-578524	3.56853e+06	98.6745	33.3635	4682.97	223.25	223.25	447
451	-624884	3.51831e+06	98.2067	32.892	4488.03	283.5	283.5	443
452	-622366	3.47924e+06	98.2627	32.5476	4584.58	129	129	441
453	-578713	3.58011e+06	98.6644	33.4659	4667.75	144.75	144.75	447
454	-592441	3.58617e+06	98.5102	33.5117	4653.32	481.75	481.75	447
455	-637307	3.51819e+06	98.0721	32.8834	4541.26	759	759	443
456	-600693	3.47808e+06	98.4975	32.5502	4436.5	159.75	159.75	441
457	-615626	3.47272e+06	98.3402	32.4939	4526.17	168.25	168.25	441
458	-622012	3.55747e+06	98.2087	33.2402	4365.77	147.75	660.5	443
459	-633583	3.55351e+06	98.0858	33.1982	4240.04	385.25	12767.8	443
460	-608117	3.56006e+06	98.3581	33.2715	4411.59	341.5	341.5	458
461	-616562	3.57082e+06	98.2581	33.3616	4392.19	171.25	171.25	458
462	-644532	3.53981e+06	97.9773	33.0701	4295.06	324	2066.75	459
463	-634539	3.57035e+06	98.0626	33.3465	4307.68	211.25	3541.5	459
464	-650856	3.56686e+06	97.8875	33.3054	4318.3	329.5	6774.25	459
465	-662703	3.55003e+06	97.7719	33.149	4376.72	360	961	462
466	-659954	3.56846e+06	97.7872	33.3138	4376.35	101.75	101.75	464
467	-659240	3.53495e+06	97.8214	33.0178	4461.29	231.75	231.75	462
468	-673631	3.55823e+06	97.6465	33.2144	4414.9	148.25	148.25	465
469	-637282	3.59361e+06	98.0148	33.5505	4396.26	242.75	2949.75	463
470	-642779	3.58163e+06	97.9641	33.4411	4399.03	142.75	142.75	463
471	-625203	3.58518e+06	98.1531	33.4834	4528.63	128	128	463
472	-620782	3.57912e+06	98.2059	33.4325	4494.33	109.75	109.75	463
473	-652223	3.58909e+06	97.8552	33.5011	4529.54	184.5	184.5	464
474	-662024	3.51759e+06	97.8048	32.8624	4690.76	257	257	462
475	-654042	3.51121e+06	97.8962	32.8111	4709.15	293	293	462
476	-674432	3.53387e+06	97.6574	32.9984	4621.87	264.25	264.25	465
477	-682307	3.54643e+06	97.5618	33.1043	4550.32	188.5	188.5	465
478	-633686	3.60714e+06	98.0437	33.6724	4548.85	177.5	2003	469
479	-645973	3.59831e+06	97.9162	33.5866	4514	113.25	113.25	469
480	-661868	3.59458e+06	97.7455	33.5435	4493.13	221.75	1695.25	464
481	-672748	3.57696e+06	97.641	33.3806	4369.88	384.5	4463.25	464
482	-624883	3.61436e+06	98.1346	33.7416	4580.72	328.75	1722.75	478
483	-624859	3.59765e+06	98.1475	33.5939	4581.84	102.75	102.75	478
484	-639997	3.62515e+06	97.9607	33.8277	4713.72	231.25	231.25	469
485	-671961	3.59063e+06	97.6385	33.502	4649.6	151.5	151.5	480
486	-680594	3.56892e+06	97.562	33.3043	4312.39	109.5	109.5	481
487	-622294	3.62996e+06	98.1511	33.8811	4642.86	295	295	482
488	-645692	3.6184e+06	97.9036	33.7644	4662.96	119.75	119.75	469
489	-653846	3.61939e+06	97.8135	33.7679	4700.77	239.75	239.75	469
490	-673038	3.59866e+06	97.6202	33.5722	4738.2	133.25	133.25	480
491	-690325	3.56684e+06	97.4578	33.2794	4393.3	247.5	247.5	481
492	-603078	3.62044e+06	98.369	33.8086	4566.01	199.75	199.75	482
493	-610006	3.6072e+06	98.3028	33.6874	4536.37	242.25	899.25	482
494	-658459	3.61021e+06	97.7703	33.6839	4557.23	138	138	480
495	-672246	3.61056e+06	97.6192	33.678	4603.59	233.75	1050.75	480
496	-688666	3.59022e+06	97.4565	33.4873	4575.34	257.75	257.75	481
497	-697192	3.57683e+06	97.3747	33.3631	4325.85	109.75	3464	481
498	-594790	3.60886e+06	98.4682	33.711	4636.44	208.25	208.25	493
499	-684109	3.61007e+06	97.4898	33.6658	4728.2	147	147	495
500	-682487	3.61943e+06	97.4998	33.7495	4598.64	112.5	670	495
501	-705864	3.57336e+06	97.2832	33.3265	4517.04	104.25	104.25	497
502	-593170	3.5992e+06	98.4929	33.6265	4673.69	194.5	194.5	493
503	-611876	3.59183e+06	98.2937	33.5502	4613.09	254.25	254.25	493
504	-669589	3.63226e+06	97.6306	33.8715	4714.11	431.75	431.75	500
505	-686316	3.62893e+06	97.45	33.8309	4635.93	125.75	125.75	500
506	-696629	3.59409e+06	97.3664	33.5161	4642.12	123.25	123.25	497
507	-708949	3.60012e+06	97.2267	33.5609	4602.54	750	3126.75	497
508	-722094	3.61065e+06	97.074	33.6447	4679.53	101.75	101.75	507
509	-721797	3.62036e+06	97.0688	33.7307	4602.46	136.5	136.5	507
510	-697154	3.61633e+06	97.3419	33.7122	4640.08	153.5	153.5	507
511	-710921	3.62413e+06	97.1845	33.7717	4465.43	130.75	1985	507
512	-725160	3.63291e+06	97.0209	33.8392	4554.99	244.5	244.5	511
513	-707548	3.63526e+06	97.2119	33.8723	4533.3	100.25	1020.5	511
514	-713942	3.63992e+06	97.1377	33.9091	4517.46	126.25	589.25	511
515	-696485	3.62629e+06	97.3408	33.8007	4648.29	117.25	117.25	513
516	-694295	3.64022e+06	97.353	33.9253	4593.1	278.25	803	513
517	-717066	3.65108e+06	97.0937	34.0055	4622.88	110.5	110.5	514
518	-725565	3.64484e+06	97.0059	33.9443	4569.48	104.25	352.5	514
519	-673127	3.65456e+06	97.5735	34.0662	4756.27	395.5	395.5	516
520	-675803	3.64174e+06	97.5546	33.9512	4756.58	129.25	129.25	516
521	-726273	3.65568e+06	96.9886	34.0395	4637.2	105.25	105.25	518
522	-735469	3.64559e+06	96.8966	33.9438	4652.27	143	143	518
