# Supplementary material for: Comparing machine learning and deep learning models for probabilistic post-processing of satellite precipitation-driven streamflow simulation
Source: Copernicus journal article supplement (doi:10.5194/hess-2022-377), 2022-11-21
Supplement: Supplementary file 1 [file hess-2022-377-supplement.zip]

Archive with 2 entries (2 files):
- Basin_Attr.xlsx
- Supplement_Compare_PLSTM_and_QRF_submit_hess.pdf
